# Supplementary material for: Improved Electrochemical Performance of Li-Rich Cathode Materials via Spinel Li2MoO4 Coating
Source: Materials (Basel). 2023 Aug 17;16(16):5655. doi: 10.3390/ma16165655 (PMC10456268; doi:10.3390/ma16165655)
Supplement: Supplementary file 1 [file materials-16-05655-s001.zip › materials-2510823-supplementary.pdf]

# Supporting Information

## Improved electrochemical performance of Li-Rich Cathode Materials via Spinel $\text{Li}_2\text{MoO}_4$ Coating

Shuhao Zhang <sup>1</sup> Yun Ye <sup>1,2</sup> Zhaoxiong Chen <sup>1</sup> Qinghao Lai <sup>1</sup> Tie Liu <sup>3</sup> Qiang Wang <sup>3</sup> Shuang Yuan <sup>1,\*</sup>

1 School of Metallurgy, Northeastern University, Shenyang 110819, China

2 Key Laboratory for Ecological Metallurgy of Multimetallc Mineral, Ministry of Education, Northeastern University, Shenyang 110819, China

3 Key Laboratory of Electromagnetic Processing of Materials, Ministry of Education, Northeastern University, Shenyang 110819, China

\* Correspondence: [yuans@smm.neu.edu.cn](mailto:yuans@smm.neu.edu.cn); Tel.: 86-024-83681171

**Table S1.** Composition of cational elements in sample Pristine, 1wt%, 3wt% and 5wt% as measured by ICP-OES.

| Samples  | Sampling quality(g) | Constant volume(mL) | Measured element | Instrument reading(mg/L) | Converted content (mg/kg) | Sample element content(%) |
|----------|---------------------|---------------------|------------------|--------------------------|---------------------------|---------------------------|
| Pristine | 0.0548              | 25                  | Li               | 2.011                    | 91734.5                   | 9.17%                     |
|          | 0.0548              | 25                  | Li               | 2.011                    | 91723.9                   | 9.17%                     |
|          | 0.0548              | 25                  | Mn               | 7.587                    | 346126.4                  | 34.61%                    |
|          | 0.0548              | 25                  | Mn               | 7.584                    | 345969.7                  | 34.60%                    |
|          | 0.0548              | 25                  | Co               | 1.978                    | 90258.6                   | 9.03%                     |
|          | 0.0548              | 25                  | Co               | 1.979                    | 90285.8                   | 9.03%                     |
|          | 0.0548              | 25                  | Ni               | 1.701                    | 77585.9                   | 7.76%                     |
|          | 0.0548              | 25                  | Ni               | 1.710                    | 78006.2                   | 7.80%                     |
| 1wt%     | 0.0644              | 25                  | Mo               | 1.352                    | 5248.0                    | 0.52%                     |
|          | 0.0644              | 25                  | Mo               | 1.358                    | 5271.7                    | 0.53%                     |
| 3wt%     | 0.0557              | 25                  | Mo               | 3.430                    | 15394.1                   | 1.54%                     |
|          | 0.0557              | 25                  | Mo               | 3.429                    | 15389.2                   | 1.54%                     |
| 5wt%     | 0.0486              | 25                  | Mo               | 5.057                    | 26011.3                   | 2.60%                     |
|          | 0.0486              | 25                  | Mo               | 5.061                    | 26032.0                   | 2.60%                     |

**Table S2.** ICP-OES results of the obtained samples.

|                                                                   | Target material                                                                           |         | ICP data                                                                                       |  |
|-------------------------------------------------------------------|-------------------------------------------------------------------------------------------|---------|------------------------------------------------------------------------------------------------|--|
| Pristine                                                          | Li <sub>1.2</sub> Mn <sub>0.54</sub> Co <sub>0.13</sub> Ni <sub>0.13</sub> O <sub>2</sub> |         | Li <sub>1.127</sub> Mn <sub>0.537</sub> Co <sub>0.131</sub> Ni <sub>0.113</sub> O <sub>2</sub> |  |
| Mass proportion of Li <sub>2</sub> MoO <sub>4</sub> coating layer |                                                                                           |         |                                                                                                |  |
| Designed                                                          | 1wt%                                                                                      | 3wt%    | 5wt%                                                                                           |  |
| ICP data                                                          | 0.95wt%                                                                                   | 2.79wt% | 4.71wt%                                                                                        |  |

The design value is the mass fraction of  $(\text{NH}_4)_2\text{MoO}_4$  relative to Li-rich materials, while the experimental value is the mass fraction of  $\text{Li}_2\text{MoO}_4$  relative to the overall sample.

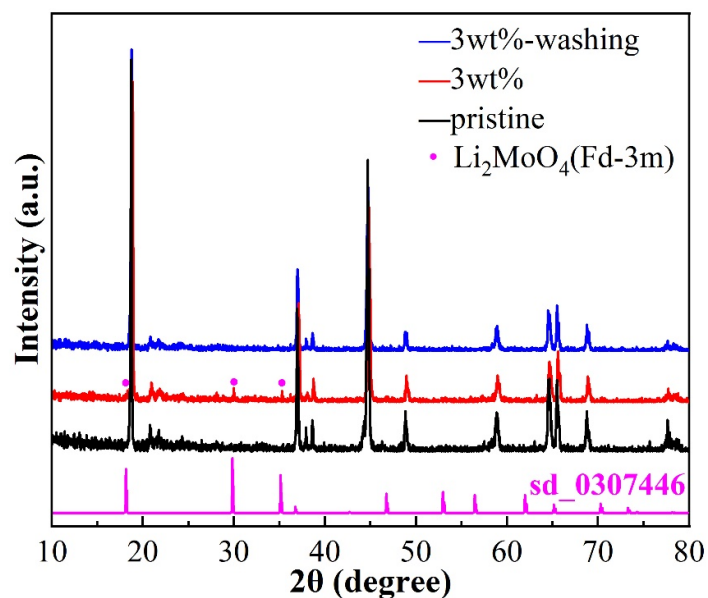

**Figure S1.** XRD spectrum analysis of spinel  $\text{Li}_2\text{MoO}_4$  phase.

The peaks observed near 18, 30, and 35° are completely matched with the peaks of pure  $\text{Li}_2\text{MoO}_4$  with spinel Fd-3m crystal structure (sd\_0307446), and based on the good water solubility of  $\text{Li}_2\text{MoO}_4$ , the peak of  $\text{Li}_2\text{MoO}_4$  disappears after washing with deionized water [1].

[https://materials.springer.com/isp/crystallographic/docs/sd\\_0307446](https://materials.springer.com/isp/crystallographic/docs/sd_0307446)

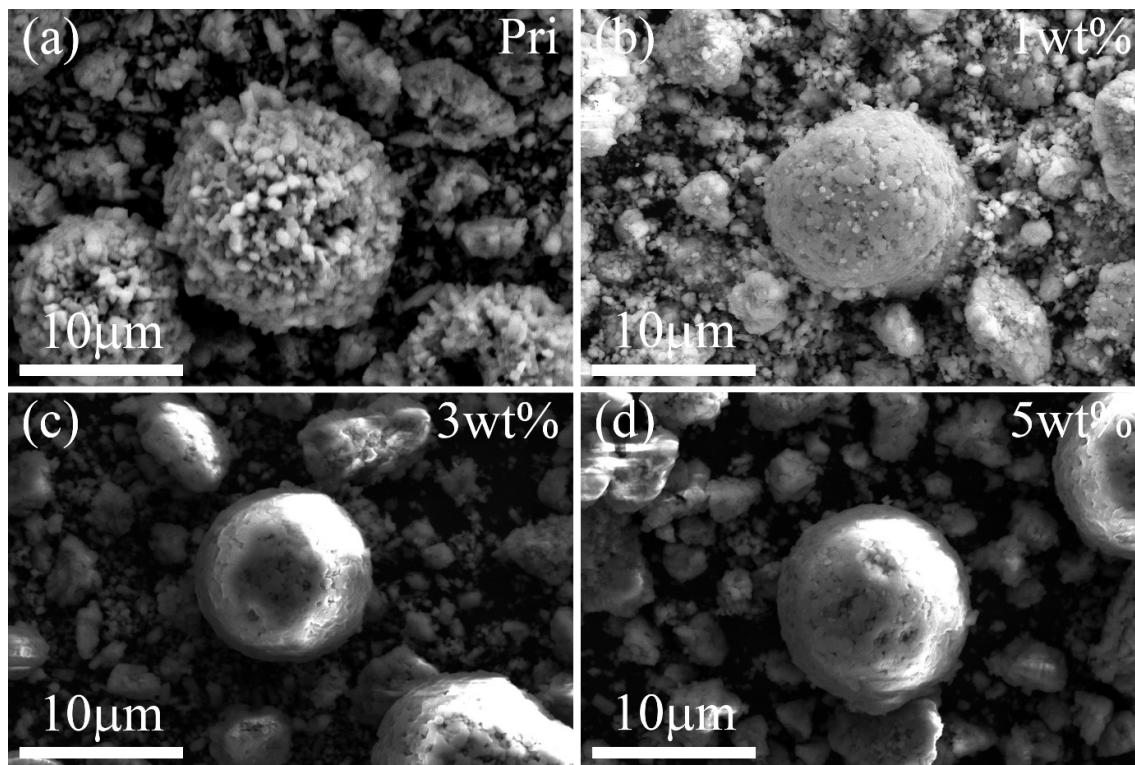

**Figure S2.** SEM images for (a) Pristine, (b) 1wt%, (c) 3wt%, (d) 5wt%.

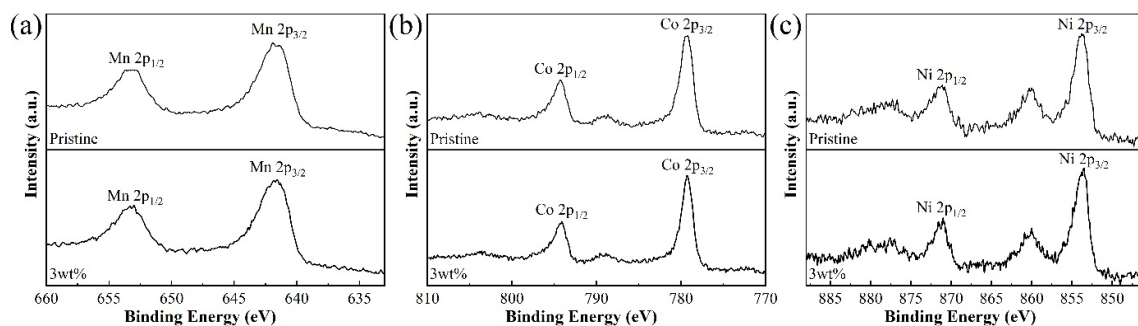

**Figure S3.** XPS spectra of (a) Mn 2p, (b) Co 2p, and (c) Ni 2p for Pristine and 3wt% sample.

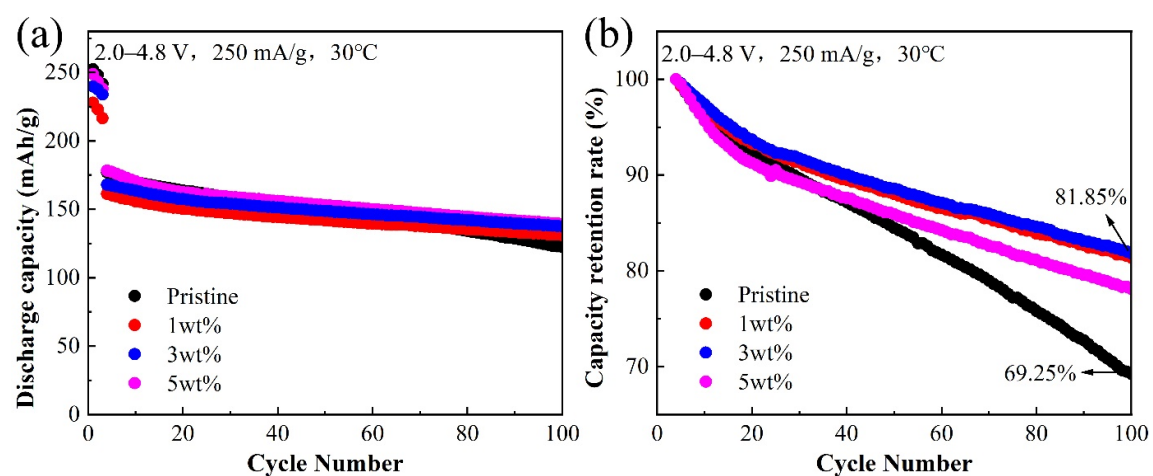

**Figure S4.** The cycling performance (a) and capacity retention rate (b) of four samples at 1C.

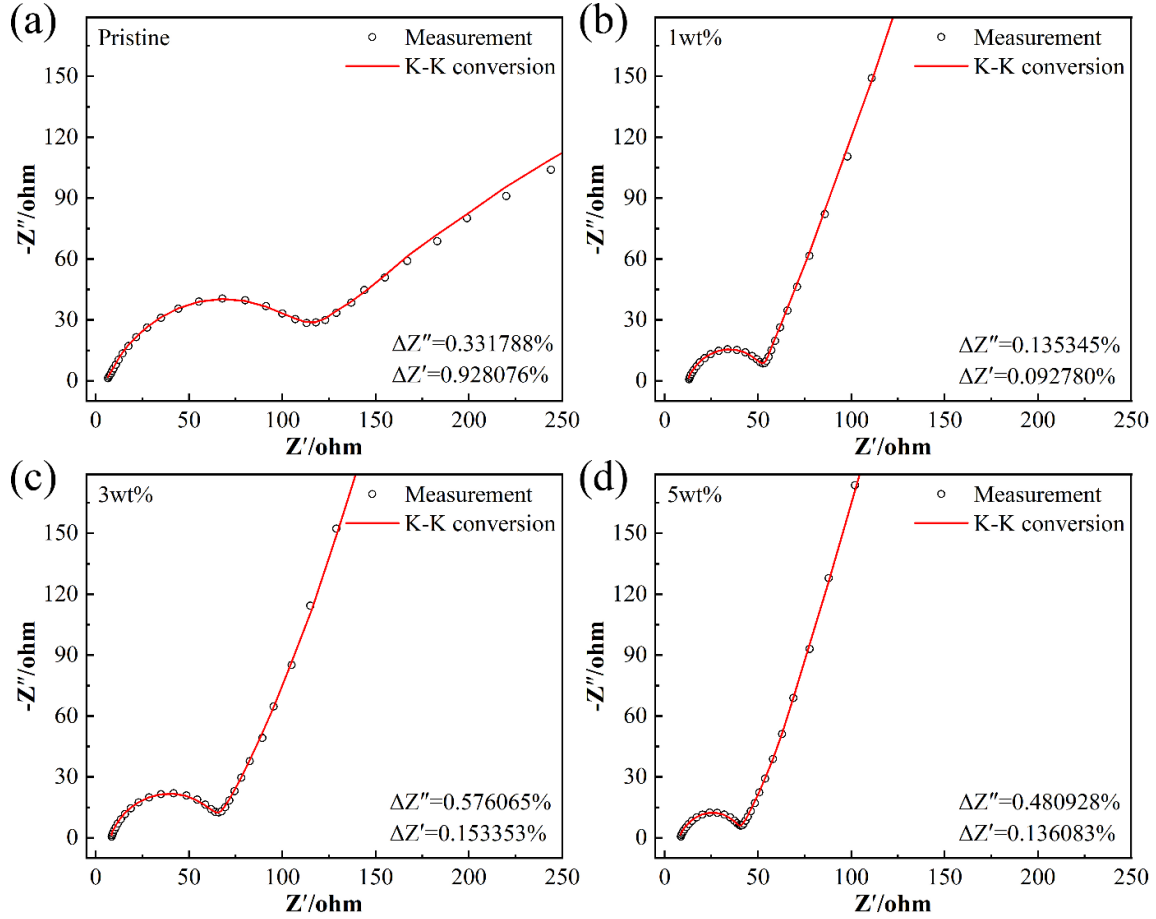

**Figure S5.** The Kramers-Kronig residual analysis of the four samples.

The Kramers-Kronig conversion values corresponding to the experimental measured values were obtained by ZView software, and the residual error between the measured values and the Kramers-Kronig conversion values was calculated by the following formula [2,3].

$$\Delta Z = \frac{\sum_{x=1}^N |Z_{ex}(x) - Z_{K-K}(x)|}{N \times |Z|_{max}}$$

In the above formula,  $|Z_{ex}(x) - Z_{K-K}(x)|$  is the absolute value of the difference between the experimental measured value and the Kramers-Kronig conversion value,  $|Z|_{max}$  is the maximum value of the absolute value of the experimental measured value, and  $N$  is the number of sampling points.

It can be seen from Figure S5 that the experimental measured values of EIS of the four samples are in good agreement with Kramers-Kronig conversion values, and the residual errors are all less than 1%, indicating that the EIS data satisfy Kramers-Kronig relationship and can be used to study the kinetic properties of prepared samples [3].

## References

1. Zhu Z, Gao R, Waluyo I, Dong Y H, Hunt A, Lee J, Li J. Stabilized Co-Free Li-Rich Oxide Cathode Particles with An Artificial Surface Prereconstruction. *Advanced Energy Materials*, **2020**, *10*, 2001120.
2. Bastidas J M, Polo J L, Torres C L, Cano E. A study on the stability of AISI 316L stainless steel pitting corrosion through its transfer function. *Corrosion Science*, **2001**, *43*, 269-281.
3. Weiss A, Schindler S, Galbiati S, Danzer M A, Zeis R. Distribution of Relaxation Times Analysis of High-Temperature PEM Fuel Cell Impedance Spectra. *Electrochimica Acta*, **2017**, *230*, 391-398.
